# Supplementary material
Source: PubMed Central journal article supplement (PMC6078446)
Supplement: supp_RA118.001805_135152_2_supp_149605_p9v7rp.pdf [file supp_RA118.001805_135152_2_supp_149605_p9v7rp.pdf]

| <b>Primer</b> | <b>Sequence</b>                |
|---------------|--------------------------------|
| NT1 F         | GGC CAT CCT GGG GAA GAA TG     |
| NT1 R         | GGT ACA TGT CCA GCA CCT CC     |
| NT2 F         | CTG AGA AGG TCA CCC AGG TCC    |
| NT2 R         | GTG TAG ATG ACC AGC AGC A      |
| NT4 F         | ACC TAC GTC AAT GCC AAC GA     |
| NT4 R         | CCG ATC AGC TCC TCA GAG CC     |
| CM1 F         | GGA GCA GGC CCT TCC TCA AG     |
| CM1 R         | AGG GAC GAG CCT CAA AGG AG     |
| CM2 F         | GAG CGG GAG CGA AGA ATT GA     |
| CM2 R         | CAA TGG GCA ATC AAG GCG AA     |
| CM3 F         | CCA GAC CCG GGA AAA GCA AT     |
| CM3 R         | GTG TCC CTG AGA TTG AAG GTG A  |
| CMYC F        | AAA CAC AAA CTT GAA CAG CTA C  |
| CMYC R        | ATT TGA GGC AGT TTA CAT TAT GG |
| Actin F       | GTG GAC ATC CGC AAA GAC        |
| Actin R       | GGA GCA ATG ATC TTG ATC TTC A  |
| GFP F         | ACG ACG GCA ACT ACA AGA CC     |
| GFP R         | TTG TAC TCC AGC TTG TGC CC     |
| 18s F         | GGC CCT GTA ATT GGA ATG AGT C  |
| 18s R         | CCA AGA TCC AAC TAC GAG CTT    |

**Supplementary Table 1: QPCR Primers.** Comprehensive list of QPCR primers used in this study. NT refers to hERG-NT, CM refers to hERG-CM, F refers to forward, and R refers to reverse.
