# Supplementary material
Source: PubMed Central journal article supplement (PMC6078446)
Supplement: supp_RA118.001805_135152_2_supp_149609_p9v7rq.pdf [file supp_RA118.001805_135152_2_supp_149609_p9v7rq.pdf]

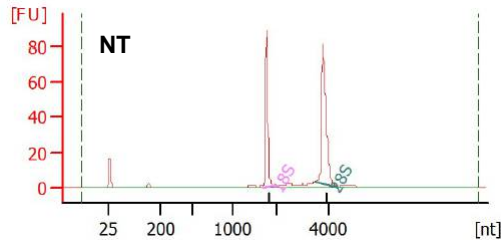

RNA Concentration: 116 ng/ $\mu$ l  
rRNA Ratio [28s / 18s]: 1.7  
RNA Integrity Number (RIN): 9.9 (B.02.08)

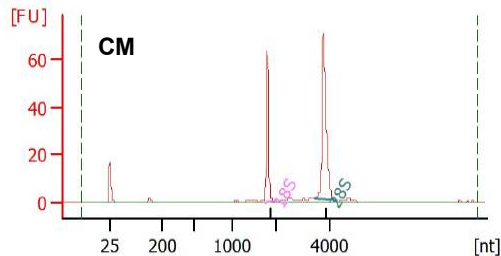

RNA Concentration: 85 ng/ $\mu$ l  
rRNA Ratio [28s / 18s]: 1.8  
RNA Integrity Number (RIN): 10 (B.02.08)
