# Supplementary material
Source: PubMed Central journal article supplement (PMC6078446)
Supplement: supp_RA118.001805_135152_2_supp_149620_p9v7rr.pdf [file supp_RA118.001805_135152_2_supp_149620_p9v7rr.pdf]

# A

|          |     |                                                           |     |
|----------|-----|-----------------------------------------------------------|-----|
| KCNH2-CM | 1   | atgccagttagacgcgggtcatggtgcacctcaaaacacgtttcttgatac       | 50  |
|          |     | .   .   .   .   .   .   .   .   .   .   .   .             |     |
| KCNH2-NT | 1   | atgccggtgvcggagggggccacgtcgcgccgcagaacaccttctctggacac     | 50  |
| KCNH2-CM | 51  | gattatccggaattcgaagggcaatctaggaaattcatcattgctaatg         | 100 |
|          |     | .   .     .   .   .   .   .     .   .   .                 |     |
| KCNH2-NT | 51  | catcatccgcaagtttgagggccagagccgtaagttcatcatcgccaacg        | 100 |
| KCNH2-CM | 101 | ccagagtcgagaattgvcgctgtgatctactgtaatgatggggtttgtgaa       | 150 |
|          |     | .. .   .     .     .   .     .   .   .   .   .            |     |
| KCNH2-NT | 101 | ctcgggtggagaactgvcgccgtcatctactgcaacgacggcttctgvcgag      | 150 |
| KCNH2-CM | 151 | ctctgtgggtatagcagagctgaagtcatgcaaaggccttgtacatgtga        | 200 |
|          |     | .   .   .     .     .   .     .   .   .   .               |     |
| KCNH2-NT | 151 | ctgtgvcggctactcvcggggccgaggtgatgcagvcgaccctgcacctvcga     | 200 |
| KCNH2-CM | 201 | ttttctccacggccctaggacccaaaggagggccgctgcccaaattgcc         | 250 |
|          |     | .   .   .     .   .   .   .   .   .   .   .   .           |     |
| KCNH2-NT | 201 | cttctctgcacggggccvcgvcagvcagvcgvcgctgvcgvcgagatvcgvc      | 250 |
| KCNH2-CM | 251 | aagccctcctcggggcagaagaaaggaaggtcvcgagattgctttctatcgg      | 300 |
|          |     | .     .   .   .   .   .   .   .   .   .   .               |     |
| KCNH2-NT | 251 | aggcactgctgggvcgvcgagagvcgcaaagtggaatvcgccttctaccgg       | 300 |
| KCNH2-CM | 301 | aaggacggctcttgttttctctgcctcvcgatgvcgvcctctgcaaaaa         | 350 |
|          |     | .   .   .     .   .   .   .   .     .   .   .             |     |
| KCNH2-NT | 301 | aaagatgggagctgcttctctatgtctggtggatgvcggtgcccgtgaagaa      | 350 |
| KCNH2-CM | 351 | vcgagvcggtgvcgctgattatgvtcacttaactttgaagtcvcgcatgg        | 400 |
|          |     | .   .   .   .     .     .   .   .   .   .                 |     |
| KCNH2-NT | 351 | vcgagvatggggctgtcatcatgvtcatcctcaatttcvcgaggtggtgatgg     | 400 |
| KCNH2-CM | 401 | aaaaagatatggtvcgvcagtcvcgcccacgatataaatcatagagggcct       | 450 |
|          |     | .   .   .     .   .     .   .   .   .   .   .             |     |
| KCNH2-NT | 401 | agaaggacatggtgggggtccccggctcatgacaccaaccacggggcccc        | 450 |
| KCNH2-CM | 451 | cctacatcttggctvcgctccccgggagggctaaaacattcaggctcaaact      | 500 |
|          |     | .   .     .   .   .   .   .   .   .   .   .               |     |
| KCNH2-NT | 451 | cccaccagctggctggccccaggccvcgccaagaccttccvcgctgaagct       | 500 |
| KCNH2-CM | 501 | ccctgcactcctvcgcttgaccgctagagaaagvcagvcgctcagatcaggag     | 550 |
|          |     | .   .   .   .   .     .   .   .     .   .   .             |     |
| KCNH2-NT | 501 | gcccvcgctgctggvcgctgacggccccgggagtcvcgctcgggtvcggtvcggvcg | 550 |
| KCNH2-CM | 551 | vcgctggaggggctggagccccctggvcgctgvcgctcvcgctcvcgatvcgatctc | 600 |
|          |     | .   .   .   .     .   .   .   .   .   .   .               |     |
| KCNH2-NT | 551 | vcgvcgggvcgvcgvcgvcgccccgggggvcgctggtggtggacvtggacctg     | 600 |
| KCNH2-CM | 601 | accctgctgcccccttcttctgaatctctvcgctcvcgatgaggtcaccvc       | 650 |
|          |     | .   .   .   .     .   .   .   .   .   .   .               |     |
| KCNH2-NT | 601 | acgcccvcgvcaccacagvcagvcgagtcvcgctggccctggacgaagtvcagvc   | 650 |
| KCNH2-CM | 651 | tatggataatcatgvcgvcggttgggccccctgvcggaagaaagaagggccc      | 700 |
|          |     | .     .   .   .   .   .   .   .   .   .   .   .           |     |
| KCNH2-NT | 651 | catggacaaccacvtggvcagggctcgggccccvcgvcgagvcgvcgctvcgvc    | 700 |

|          |      |                                                           |      |
|----------|------|-----------------------------------------------------------|------|
| KCNH2-CM | 701  | tcgtcggccctggttctccccacgggtctgccccagggcaattgcctagc        | 750  |
|          |      | . . . . . . . . . . . . . . . . . . . . . . . . . . . . . |      |
| KCNH2-NT | 701  | tggtgggtcccggctctccgccccgcagcgcgcccgccagctcccatcg         | 750  |
| KCNH2-CM | 751  | cctagagcccattctttgaatcctgatgccagcgggagttcttgttctct        | 800  |
|          |      | . . . . . . . . . . . . . . . . . . . . . . . . . .       |      |
| KCNH2-NT | 751  | ccccgggcgcacagcctcaaccccgacgcctcgggctccagctgcagcct        | 800  |
| KCNH2-CM | 801  | cgctagaaccaggagtagggagtcttgtgcttctgtcaggagggcaagca        | 850  |
|          |      | . . . . . . . . . . . . . . . . . . . . . . . . .         |      |
| KCNH2-NT | 801  | ggccccggacgcgctcccagaaaagctgcgccagcgtgcgccgcgcctcgt       | 850  |
| KCNH2-CM | 851  | gcgctgatgatattgaagctatgagggctggcgtcctccctccacccccca       | 900  |
|          |      | . . . . . . . . . . . . . . . . . . . . . . . . .         |      |
| KCNH2-NT | 851  | cggccgacgacatcgaggccatgcgcgccggggtgctgccccgccaccg         | 900  |
| KCNH2-CM | 901  | aggcatgcttctacagggcgtatgcatcccctgaggtctgggctcttgaa        | 950  |
|          |      | . . . . . . . . . . . . . . . . . . . . . . . . .         |      |
| KCNH2-NT | 901  | cgccacgccagcaccggggccatgcacccactgcgcagcggcttgctcaa        | 950  |
| KCNH2-CM | 951  | tagtacaagcgatagtgatttgggtcaggtataggacaatctctaagattc       | 1000 |
|          |      | .... . . . . . . . . . . . . . . . . . . . . . . .        |      |
| KCNH2-NT | 951  | ctccacctcggactccgacctcgtgcgctaccgcaccattagcaagattc        | 1000 |
| KCNH2-CM | 1001 | cacaaatcacattgaatttcgttgatttgaaaggcgatccttttctcgcc        | 1050 |
|          |      | . . . . . . . . . . . . . . . . . . . . . . . .           |      |
| KCNH2-NT | 1001 | cccaaatcacacctcaactttgtggacctcaagggcgaccccttcttggt        | 1050 |
| KCNH2-CM | 1051 | agccctacatccgatagggagatcatcgccccaaaatcaaagaaaggac         | 1100 |
|          |      | ... . . . . . . . . . . . . . . . . . . . . . . .         |      |
| KCNH2-NT | 1051 | tcgcccaccagtgaccgtgagatcatagcacctaagataaaggagcgaac        | 1100 |
| KCNH2-CM | 1101 | acataacgtgaccgaaaaagtgcacaaagtgctcagtcctcggggctgatg       | 1150 |
|          |      | . . . . . . . . . . . . . . . . . . . . . . . . .         |      |
| KCNH2-NT | 1101 | ccacaatgtcactgagaagggtcaccaggtcctgtccctggggcgccgacg       | 1150 |
| KCNH2-CM | 1151 | tcctccccgagtacaagctccaagctccaagaattcacaggtggacaatt        | 1200 |
|          |      | . . . . . . . . . . . . . . . . . . . . . . . .           |      |
| KCNH2-NT | 1151 | tgctgcctgagtacaagctgcaggcaccgcgcatccaccgctggaccatc        | 1200 |
| KCNH2-CM | 1201 | ctccactattctcctttcaaggctgtctgggattgggtgattctcctcct        | 1250 |
|          |      | . . . . . . . . . . . . . . . . . . . . . . . .           |      |
| KCNH2-NT | 1201 | ctgcattacagcccttcaaggccgtgtgggactggctcatcctgctgct         | 1250 |
| KCNH2-CM | 1251 | cgtgatctataaccgccgtgtttacccttatagegccgcttttctcctca        | 1300 |
|          |      | . . . . . . . . . . . . . . . . . . . . . . . .           |      |
| KCNH2-NT | 1251 | ggtcatctacacggctgtcttcacaccctactcggctgccttctctgctga       | 1300 |
| KCNH2-CM | 1301 | aagaaactgaggagggctcctcccgaacagaatgcgggtatgcttgtcaa        | 1350 |
|          |      | . . . . . . . . . . . . . . . . . . . . . . . .           |      |
| KCNH2-NT | 1301 | aggagacggaagaaggcccgcctgctaccgagtggtggctacgcctgccag       | 1350 |
| KCNH2-CM | 1351 | cccctcgccggttgtcgatttgattgtggacatcatgtttatcgtggacat       | 1400 |
|          |      | . . . . . . . . . . . . . . . . . . . . . . . .           |      |
| KCNH2-NT | 1351 | ccgctggctgtgggtggacctcatcgtggacatcatgttcattgtggacat       | 1400 |



|          |      |                                                       |      |
|----------|------|-------------------------------------------------------|------|
| KCNH2-CM | 2101 | ttccaacatgcttggagttatacaaatgggattgatatgaatgccgtcct    | 2150 |
|          |      | .   .   .   .   .   .   .   .   .   .   .   .   .     |      |
| KCNH2-NT | 2101 | ttccagcagcctggctctacaccaacggcatcgacatgaacgcgggtgct    | 2150 |
| KCNH2-CM | 2151 | caaagggtttcccgaatgtctccaagccgacatctgtctccatctcaata    | 2200 |
|          |      | .   .   .   .   .   .   .   .   .   .   .   .   .   . |      |
| KCNH2-NT | 2151 | gaagggcttccctgagtgacctgcaggtgacatctgacctgcacctgaacc   | 2200 |
| KCNH2-CM | 2201 | ggagcctcctccaacattgtaagccatttcgggggtgccacaaaaggggtg   | 2250 |
|          |      | ....   .   .   .   .   .   .   .   .   .   .   .   .  |      |
| KCNH2-NT | 2201 | gctcactgctgcagcactgcaaacccttccgagggggccaccaagggctgc   | 2250 |
| KCNH2-CM | 2251 | ttgcgggctctcgctatgaaattcaaaacaacccatgcacccccaggcga    | 2300 |
|          |      | . . . . . . . . . . . . . . . . . . . . . . . . . .   |      |
| KCNH2-NT | 2251 | cttcggggcctggccatgaagttcaagaccacacatgcaccgccagggga    | 2300 |
| KCNH2-CM | 2301 | taccctcgtccacgcggagatctcttgacagctctctacttcatctcca     | 2350 |
|          |      | .   .   .   .   .   .   .   .   .   .   .   .   .     |      |
| KCNH2-NT | 2301 | cacactggtgcatgctggggacctgctcaccgccctgtacttcatctccc    | 2350 |
| KCNH2-CM | 2351 | gagggagattgaaattctcagaggggatgtgggtggtcgctattctcggc    | 2400 |
|          |      | .   .   .   .   .   .   .   .   .   .   .   .   .     |      |
| KCNH2-NT | 2351 | ggggctccatcgagatcctgcgggggcgacgtcgtcgtggccatcctgggg   | 2400 |
| KCNH2-CM | 2401 | aaaaacgacatctttggcgaaccactcaatctctacgccagaccgggaa     | 2450 |
|          |      | .   .   .   .   .   .   .   .   .   .   .   .         |      |
| KCNH2-NT | 2401 | aagaatgacatctttggggagcctctgaacctgtatgcaaggcctggcaa    | 2450 |
| KCNH2-CM | 2451 | aagcaatggcgcagctcagagctttgacatattgcgatttgacacaagatcc  | 2500 |
|          |      | ....   .   .   .   .   .   .   .   .   .   .   .      |      |
| KCNH2-NT | 2451 | gtcgaacggggatgtgcgggccctcacctactgtgacctacacaagatcc    | 2500 |
| KCNH2-CM | 2501 | acagagatgatctcctcgaagtccctcgatagtatccccaggttagtgat    | 2550 |
|          |      | .. . . . . . . . . . . . . . . . . . . . . . . .      |      |
| KCNH2-NT | 2501 | atcgggacgacctgctggagggtgctggacatgtaccctgagttctccgac   | 2550 |
| KCNH2-CM | 2551 | cacttttgagttctctcgaaatcaccttcaatctcagggacacaaacat     | 2600 |
|          |      | .   .   .   .   .   .   .   .   .   .   .             |      |
| KCNH2-NT | 2551 | cacttctggtccagcctggagatcaccttcaacctgcgagataccaacat    | 2600 |
| KCNH2-CM | 2601 | gattcccgggagtgccaggggtccaccgaactggaaggcgggtttccagac   | 2650 |
|          |      | .   .   .   .   .   .   .   .   .   .   .   .         |      |
| KCNH2-NT | 2601 | gatcccgggctccccggcagtgacggagtttagaggggtggcttcagtcggc  | 2650 |
| KCNH2-CM | 2651 | agaggaaaaggaaactcagttttaggaggcgcacggataaagataccgaa    | 2700 |
|          |      | .. . . . . . . . . . . . . . . . . . . . . . .        |      |
| KCNH2-NT | 2651 | aacgcaagcgcaagttgtccttccgcagggcgcacggacaaggacacggag   | 2700 |
| KCNH2-CM | 2701 | caaccggcgaagtgcagcgtctgggcccctggcagagcaggagcaggccc    | 2750 |
|          |      | .   .   .   .   .   .   .   .   .   .   .   .         |      |
| KCNH2-NT | 2701 | cagccaggggaggtgtcggccttggggccggggccggggcggggcagggcc   | 2750 |
| KCNH2-CM | 2751 | ttcctcaagagggaggccaggaggtccctggggagaaatctcccagttccg   | 2800 |
|          |      | ..... . . . . . . . . . . . . . . . . . . . . .       |      |
| KCNH2-NT | 2751 | gagtagccggggccggccggggggggccgtggggggagagcccgtccagtg   | 2800 |



|         |                                                                              |      |
|---------|------------------------------------------------------------------------------|------|
| hERG-NT | MPVRRGHVAPQNTFLDTIIRKFEGQSRKFIIANARVENCACAVIYCNDFGFCLECGYSRAEVM              | 60   |
| hERG-CM | MPVRRGHVAPQNTFLDTIIRKFEGQSRKFIIANARVENCACAVIYCNDFGFCLECGYSRAEVM<br>*****     | 60   |
| hERG-NT | QRPCTCDFLHGPRTORRAAAQIAQALLGAERKVEIAFYRKDGSCFLCLVDVVPVKNEDEG                 | 120  |
| hERG-CM | QRPCTCDFLHGPRTORRAAAQIAQALLGAERKVEIAFYRKDGSCFLCLVDVVPVKNEDEG<br>*****        | 120  |
| hERG-NT | AVIMFILNFVVMKDMVGS PAHDTNHRGPP TSWLAPGRAKTFRLKLPALLALTARESSV                 | 180  |
| hERG-CM | AVIMFILNFVVMKDMVGS PAHDTNHRGPP TSWLAPGRAKTFRLKLPALLALTARESSV<br>*****        | 180  |
| hERG-NT | RSGGAGGAGAPGAVVVDVLT PAAPSSS LALDEVTAMD NHVAGLPAEERRALVGP GSP                | 240  |
| hERG-CM | RSGGAGGAGAPGAVVVDVLT PAAPSSS LALDEVTAMD NHVAGLPAEERRALVGP GSP<br>*****       | 240  |
| hERG-NT | PRSAPGQLPS PRAHSLNP DASGSSCSLAR TRSRESCASVRRASSADD IEAMRAGVL PPPP            | 300  |
| hERG-CM | PRSAPGQLPS PRAHSLNP DASGSSCSLAR TRSRESCASVRRASSADD IEAMRAGVL PPPP<br>*****   | 300  |
| hERG-NT | RHASTGAMHPLRSGLLNSTSDSDLVRYRTISKIPQITLNFVDLKGDPFLASPTSDREIIA                 | 360  |
| hERG-CM | RHASTGAMHPLRSGLLNSTSDSDLVRYRTISKIPQITLNFVDLKGDPFLASPTSDREIIA<br>*****        | 360  |
| hERG-NT | PKIKERTHNVTEKVTQVLSL GADVLPEYK LQAPRIHRWTILHYS PFKAVDWL LLLLVIY              | 420  |
| hERG-CM | PKIKERTHNVTEKVTQVLSL GADVLPEYK LQAPRIHRWTILHYS PFKAVDWL LLLLVIY<br>*****     | 420  |
| hERG-NT | TAVFTPYSA AFLLKETE EGP PAT ECGYACQ PLAVVDLIVD IMFIVDILINFR TTYVNANE          | 480  |
| hERG-CM | TAVFTPYSA AFLLKETE EGP PAT ECGYACQ PLAVVDLIVD IMFIVDILINFR TTYVNANE<br>***** | 480  |
| hERG-NT | EVVSHPGRIAVHYFKGWFLIDMVA AIPFDLLIFGSGS EELIGLLKTARLLRLVRVARKLD               | 540  |
| hERG-CM | EVVSHPGRIAVHYFKGWFLIDMVA AIPFDLLIFGSGS EELIGLLKTARLLRLVRVARKLD<br>*****      | 540  |
| hERG-NT | RYSEYGA AVFLFLMCTFALIAHWLACI WYAI GNM EQPHMDSRIGWLHNLGDQIGKPYNSS             | 600  |
| hERG-CM | RYSEYGA AVFLFLMCTFALIAHWLACI WYAI GNM EQPHMDSRIGWLHNLGDQIGKPYNSS<br>*****    | 600  |
| hERG-NT | GLGGPSIKDKYVTALYFTFSS L TSVGFGNVSPNTNSEKIF SICVMLIGSLMYASIFGNVS              | 660  |
| hERG-CM | GLGGPSIKDKYVTALYFTFSS L TSVGFGNVSPNTNSEKIF SICVMLIGSLMYASIFGNVS<br>*****     | 660  |
| hERG-NT | AIIQRLYSGTARYHTQMLRVREFIRFHQIPNPLRQRLEEYFQHAWSYTNGIDMNAVLKGF                 | 720  |
| hERG-CM | AIIQRLYSGTARYHTQMLRVREFIRFHQIPNPLRQRLEEYFQHAWSYTNGIDMNAVLKGF<br>*****        | 720  |
| hERG-NT | PECLQADICLHLNRSLLQHCKPFRGATKGCLRALAMKFKTTHAPPGDTLVHAGDLLTALY                 | 780  |
| hERG-CM | PECLQADICLHLNRSLLQHCKPFRGATKGCLRALAMKFKTTHAPPGDTLVHAGDLLTALY<br>*****        | 780  |
| hERG-NT | FISRGSIEILRGDVVVA I L GKN DIFGEPLNLYARPGKSN GDV RALTYCDLHKIHRDDLLE           | 840  |
| hERG-CM | FISRGSIEILRGDVVVA I L GKN DIFGEPLNLYARPGKSN GDV RALTYCDLHKIHRDDLLE<br>*****  | 840  |
| hERG-NT | VLDMPYEFSDHFWSSLEITFNLRD TNMIPGSPGSTELEGGFSRQRKRKLSFRRRTDKDTE                | 900  |
| hERG-CM | VLDMPYEFSDHFWSSLEITFNLRD TNMIPGSPGSTELEGGFSRQRKRKLSFRRRTDKDTE<br>*****       | 900  |
| hERG-NT | QPGEVSALGPGRAGAPSSRGRPGGPWGES PSSGSPSSPE SSEDEG PGRSSSPLRLV P FSS            | 960  |
| hERG-CM | QPGEVSALGPGRAGAPSSRGRPGGPWGES PSSGSPSSPE SSEDEG PGRSSSPLRLV P FSS<br>*****   | 960  |
| hERG-NT | PRPPGEPGGPEPLMEDCEKSSDTCNPLSGAFSGVSNIFSFWDGSRGRQYQELPRCPAPT P                | 1020 |
| hERG-CM | PRPPGEPGGPEPLMEDCEKSSDTCNPLSGAFSGVSNIFSFWDGSRGRQYQELPRCPAPT P<br>*****       | 1020 |

\*\*\*\*\*

hERG-NT SLLNIPLSSPGRRPRGDVESRLDALQRQLNRLETRLSDMATVLQLLQRQMTLVPPAYSA 1080

hERG-CM SLLNIPLSSPGRRPRGDVESRLDALQRQLNRLETRLSDMATVLQLLQRQMTLVPPAYSA 1080

\*\*\*\*\*

hERG-NT VTTPGPGPTSTSPLLPVSPLPTLTLDSLSQVSQFMACEELPPGAPQLPQEGPTRRLSLPG 1140

hERG-CM VTTPGPGPTSTSPLLPVSPLPTLTLDSLSQVSQFMACEELPPGAPQLPQEGPTRRLSLPG 1140

\*\*\*\*\*

hERG-NT QLGALTSQPLHRHGSDPGS 1159

hERG-CM QLGALTSQPLHRHGSDPGS 1159

\*\*\*\*\*

**Supplementary Figure 1: Nucleotide and protein sequence alignment of hERG-NT and hERG-CM.**

A) hERG-NT and hERG-CM nucleotide alignment demonstrating the extensive nucleotide sequence changes in hERG-CM. B) Amino acid alignment of hERG-NT and hERG-CM, demonstrating 100% protein sequence identity.
