# Supplementary material
Source: PubMed Central journal article supplement (PMC6078446)
Supplement: supp_RA118.001805_135152_2_supp_153873_pcbc3g.pdf [file supp_RA118.001805_135152_2_supp_153873_pcbc3g.pdf]

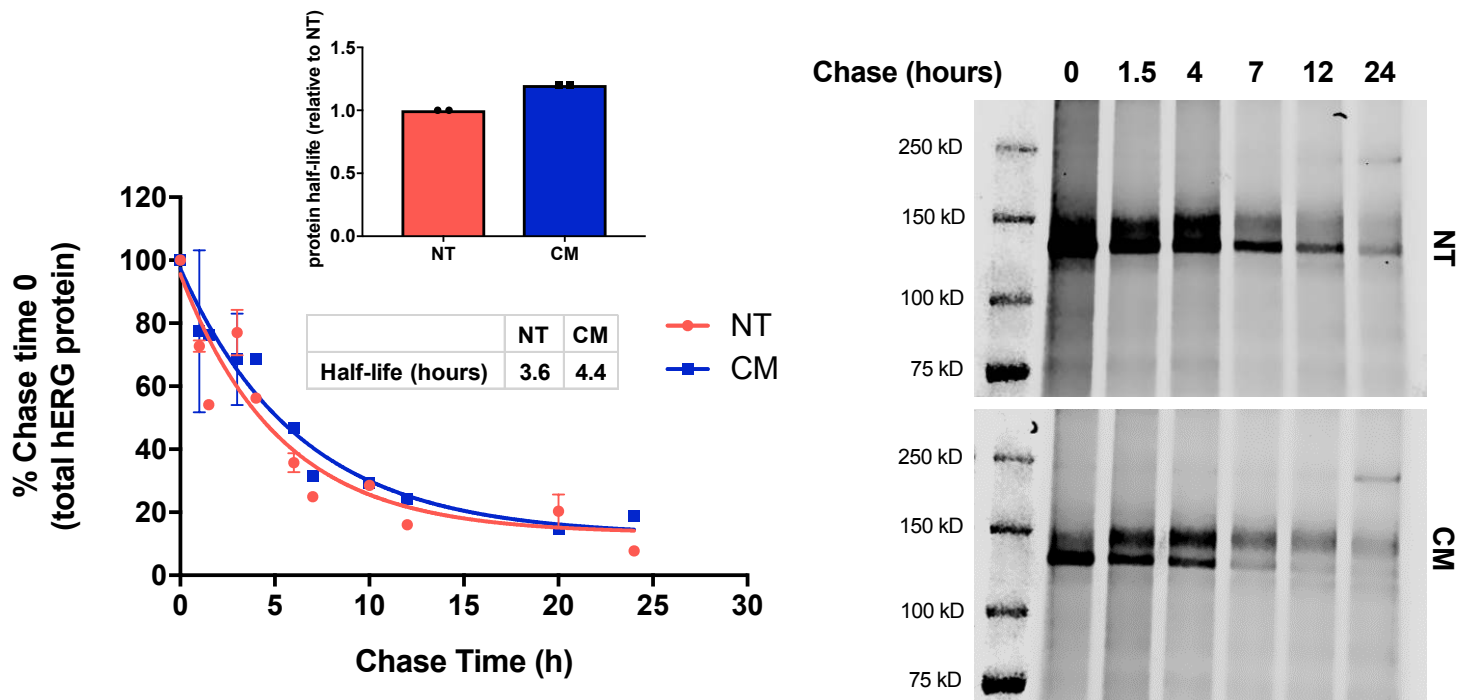

**Supplementary Figure 3: Myc-tagged hERG-CM displays a subtle increase in half-life.** Graph and representative immunoblot of AHA pulse-chase to determine amino-terminally Myc-tagged hERG-NT and hERG-CM protein half-life. Experimental procedures mentioned in the materials and methods section were followed although immunoprecipitations were performed with 500 ng of hERG C20 (Catalog # SC-15968, SantaCruz). Two independent transfections were performed (one with one replicate and the other with two replicates) (N = 2). Results of one-phase decay for the Myc-tagged hERG-NT and hERG-CM half-life determinations are shown. A bar graph representing the increases in the determined half-life of hERG-CM compared to hERG-NT protein for each independent assay (inset).
