# Supplementary material
Source: PubMed Central journal article supplement (PMC6078446)
Supplement: supp_RA118.001805_135152_2_supp_153874_pwbw3g.pdf [file supp_RA118.001805_135152_2_supp_153874_pwbw3g.pdf]

| <b>Primer</b> | <b>Sequence</b>                |
|---------------|--------------------------------|
| NT1 F         | GGC CAT CCT GGG GAA GAA TG     |
| NT1 R         | GGT ACA TGT CCA GCA CCT CC     |
| NT2 F         | CTG AGA AGG TCA CCC AGG TCC    |
| NT2 R         | GTG TAG ATG ACC AGC AGC A      |
| NT4 F         | ACC TAC GTC AAT GCC AAC GA     |
| NT4 R         | CCG ATC AGC TCC TCA GAG CC     |
| CM1 F         | GGA GCA GGC CCT TCC TCA AG     |
| CM1 R         | AGG GAC GAG CCT CAA AGG AG     |
| CM2 F         | GAG CGG GAG CGA AGA ATT GA     |
| CM2 R         | CAA TGG GCA ATC AAG GCG AA     |
| CM3 F         | CCA GAC CCG GGA AAA GCA AT     |
| CM3 R         | GTG TCC CTG AGA TTG AAG GTG A  |
| CMYC F        | AAA CAC AAA CTT GAA CAG CTA C  |
| CMYC R        | ATT TGA GGC AGT TTA CAT TAT GG |
| Actin F       | GTG GAC ATC CGC AAA GAC        |
| Actin R       | GGA GCA ATG ATC TTG ATC TTC A  |
| GFP F         | ACG ACG GCA ACT ACA AGA CC     |
| GFP R         | TTG TAC TCC AGC TTG TGC CC     |
| 18s F         | GGC CCT GTA ATT GGA ATG AGT C  |
| 18s R         | CCA AGA TCC AAC TAC GAG CTT    |

**Supplementary Table 1: QPCR Primers.** Comprehensive list of QPCR primers used in this study. NT refers to hERG-NT, CM refers to hERG-CM, F refers to forward, and R refers to reverse.

# A

|          |     |                                                        |     |
|----------|-----|--------------------------------------------------------|-----|
| KCNH2-CM | 1   | atgccagttagacgcgggtcatggtgcacctcaaaacacgtttcttgatac    | 50  |
|          |     | .   .   .   .   .   .   .   .   .   .   .   .          |     |
| KCNH2-NT | 1   | atgccggtgvcggagggggccacgtcgcgccgcagaacaccttctctggacac  | 50  |
| KCNH2-CM | 51  | gattatccggaattcgaagggcaatctaggaaattcatcattgctaatg      | 100 |
|          |     | .   .     .   .   .   .   .     .   .   .              |     |
| KCNH2-NT | 51  | catcatccgcaagtttgagggccagagccgtaagttcatcatcgccaacg     | 100 |
| KCNH2-CM | 101 | ccagagtcgagaattgvcgctgtgatctactgtaatgatggggtttgtgaa    | 150 |
|          |     | .. .   .     .     .   .     .   .   .   .   .         |     |
| KCNH2-NT | 101 | ctcgggtggagaactgvcgccgtcatctactgcaacgacggcttctgvcgag   | 150 |
| KCNH2-CM | 151 | ctctgtgggtatagcagagctgaagtcatgcaaaggccttgtacatgtga     | 200 |
|          |     | .   .   .     .     .   .     .   .   .   .            |     |
| KCNH2-NT | 151 | ctgtgvcggctactcvcggggccgaggtgatgcagvcgaccctgcacctvcga  | 200 |
| KCNH2-CM | 201 | ttttctccacggccctaggacccaaaggagggccgctgccc aaattgcc     | 250 |
|          |     | .   .   .     .   .   .   .   .   .   .   .   .        |     |
| KCNH2-NT | 201 | cttctctgcacggggccvcgvcacvcagvcgvcgctgvcgvcagatvcgvc    | 250 |
| KCNH2-CM | 251 | aagccctcctcggggcagaagaaaggaaggtcvcgagattgctttctatcgg   | 300 |
|          |     | .     .   .   .   .   .   .   .   .   .     .          |     |
| KCNH2-NT | 251 | aggcactgctgggvcgvcgagvcgcaaagtggaatvcgccttctaccgg      | 300 |
| KCNH2-CM | 301 | aaggacggctcttgttttctctgcctcvcgatgvcgvcctctgcaaaaa      | 350 |
|          |     | .   .   .     .   .   .   .   .     .   .   .          |     |
| KCNH2-NT | 301 | aaagatgggagctgcttctctatgtctggtggatgvcggtgcccgtgaagaa   | 350 |
| KCNH2-CM | 351 | cgaggacgggtgvcgctgattatgctcacttaactttgaagtcgctcatgg    | 400 |
|          |     | .   .   .   .     .     .   .   .   .   .              |     |
| KCNH2-NT | 351 | cgaggatggggctgtcatcatgctcatcctcaatttcgaggtggtgatgg     | 400 |
| KCNH2-CM | 401 | aaaaagatatggtcggcagctcccgccacgatacaaatcatagagggcct     | 450 |
|          |     | .   .   .     .   .     .   .   .   .   .   .          |     |
| KCNH2-NT | 401 | agaaggacatggtgggggtccccggctcatgacaccaaccacggggcccc     | 450 |
| KCNH2-CM | 451 | cctacatcttggctcvcctcccgggagggctaaaacattcaggctcaaact    | 500 |
|          |     | .   .     .   .   .   .   .   .   .   .   .            |     |
| KCNH2-NT | 451 | cccaccagctggctggccccaggccvcgccaagaccttccvcctgaagct     | 500 |
| KCNH2-CM | 501 | ccctgcactcctcvccttgaccgctagagaaagcagvcgctcagatcaggag   | 550 |
|          |     | .   .   .   .   .     .   .   .     .   .   .          |     |
| KCNH2-NT | 501 | gcccvcgctgctggvcgctgacggccccgggagtcvcggtgvcggtvcggvcg  | 550 |
| KCNH2-CM | 551 | gvcgctggaggggctggagccccctggvcgctgvcgvcgctcagatcvc      | 600 |
|          |     | .   .   .   .     .   .   .   .   .   .                |     |
| KCNH2-NT | 551 | gvcggggvcgvcgvcgvcgccccgggggvcggtggtggtgvcggtgvcg      | 600 |
| KCNH2-CM | 601 | accctgctgcccccttcttctgaatctctcvcgctcvcgatgaggtcaccvc   | 650 |
|          |     | .   .   .   .     .   .   .   .   .   .   .            |     |
| KCNH2-NT | 601 | acgcccvcgvcaccvcagvcgagvcgctggccctggacgaagtgcagvc      | 650 |
| KCNH2-CM | 651 | tatggataatcatgvcgvcggttgggccccctgvcgaagaaagagggccc     | 700 |
|          |     | .     .   .   .   .   .   .   .   .   .   .            |     |
| KCNH2-NT | 651 | catggacaaccvcggtggcagggctcgggccccvcgvcgagvcgvcgctvcgvc | 700 |

|          |      |                                                           |      |
|----------|------|-----------------------------------------------------------|------|
| KCNH2-CM | 701  | tcgtcggccctgggttctccccacgggtctgccccagggcaattgcctagc       | 750  |
|          |      | . . . . . . . . . . . . . . . . . . . . . . . . . . . . . |      |
| KCNH2-NT | 701  | tggtgggtcccggctctccgccccgcagcgcgcccgccagctcccatcg         | 750  |
| KCNH2-CM | 751  | cctagagccattctttgaatcctgatgccagcgggagttcttgttctct         | 800  |
|          |      | . . . . . . . . . . . . . . . . . . . . . . . . . .       |      |
| KCNH2-NT | 751  | ccccgggcgcacagcctcaaccccgacgcctcgggctccagctgcagcct        | 800  |
| KCNH2-CM | 801  | cgctagaaccaggagtagggagtcttgtgcttctgtcaggagggcaagca        | 850  |
|          |      | . . . . . . . . . . . . . . . . . . . . . . . . .         |      |
| KCNH2-NT | 801  | ggccccggacgcgctcccagaaaagctgcgccagcgtgcgccgcgcctcgt       | 850  |
| KCNH2-CM | 851  | gcgctgatgatattgaagctatgagggctggcgtcctccctccacccccca       | 900  |
|          |      | . . . . . . . . . . . . . . . . . . . . . . . . .         |      |
| KCNH2-NT | 851  | cggccgacgacatcgaggccatgcgcgcgggggtgctgccccgcaccg          | 900  |
| KCNH2-CM | 901  | aggcatgcttctacagggcgtatgcatcccctgaggtctgggctcttgaa        | 950  |
|          |      | . . . . . . . . . . . . . . . . . . . . . . . .           |      |
| KCNH2-NT | 901  | cgccacgccagcaccggggccatgcacccactgcgcagcggcttgctcaa        | 950  |
| KCNH2-CM | 951  | tagtacaagcgatagtgatttgggtcaggtataggacaatctctaagattc       | 1000 |
|          |      | .... . . . . . . . . . . . . . . . . . . . . . .          |      |
| KCNH2-NT | 951  | ctccacctcggactccgacctcgtgcgctaccgcaccattagcaagattc        | 1000 |
| KCNH2-CM | 1001 | cacaaatcacattgaatttcgttgatttgaaaggcgatccttttctcgcc        | 1050 |
|          |      | . . . . . . . . . . . . . . . . . . . . . . . .           |      |
| KCNH2-NT | 1001 | cccaaatcacacctcaactttgtggacctcaagggcgaccccttcttggt        | 1050 |
| KCNH2-CM | 1051 | agccctacatccgatagggagatcatcgccccaaaatcaaagaaaggac         | 1100 |
|          |      | ... . . . . . . . . . . . . . . . . . . . . . . .         |      |
| KCNH2-NT | 1051 | tcgcccaccagtgaccgtgagatcatagcacctaagataaaggagcgaac        | 1100 |
| KCNH2-CM | 1101 | acataacgtgaccgaaaaagtgcacaaagtgctcagtcctcggggctgatg       | 1150 |
|          |      | . . . . . . . . . . . . . . . . . . . . . . . .           |      |
| KCNH2-NT | 1101 | ccacaatgtcactgagaaggtcaccaggtcctgtccctggggcgccgacg        | 1150 |
| KCNH2-CM | 1151 | tcctccccgagtacaagctccaagctccaagaattcacaggtggacaatt        | 1200 |
|          |      | . . . . . . . . . . . . . . . . . . . . . . .             |      |
| KCNH2-NT | 1151 | tgctgcctgagtacaagctgcaggcaccgcgcatccaccgctggaccatc        | 1200 |
| KCNH2-CM | 1201 | ctccactattctcctttcaaggctgtctgggattgggtgattctcctcct        | 1250 |
|          |      | . . . . . . . . . . . . . . . . . . . . . . .             |      |
| KCNH2-NT | 1201 | ctgcattacagcccttcaaggccgtgtgggactggctcatcctgctgct         | 1250 |
| KCNH2-CM | 1251 | cgtgatctataaccgccgtgtttacccttatagegccgcttttctcctca        | 1300 |
|          |      | . . . . . . . . . . . . . . . . . . . . . . . .           |      |
| KCNH2-NT | 1251 | ggtcatctacacggctgtcttcacaccctactcggctgccttctctgctga       | 1300 |
| KCNH2-CM | 1301 | aagaaactgaggagggctcctcccgaacagaatgcgggtatgcttgtcaa        | 1350 |
|          |      | . . . . . . . . . . . . . . . . . . . . . . .             |      |
| KCNH2-NT | 1301 | aggagacggaagaaggcccgcctgctaccgagtggtggctacgcctgccag       | 1350 |
| KCNH2-CM | 1351 | cccctcgccgttgtcgatttgattgtggacatcatgtttatcgtggacat        | 1400 |
|          |      | . . . . . . . . . . . . . . . . . . . . . . .             |      |
| KCNH2-NT | 1351 | ccgctggctgtgggtggacctcatcgtggacatcatgttcattgtggacat       | 1400 |

|          |      |                                                            |      |
|----------|------|------------------------------------------------------------|------|
| KCNH2-CM | 1401 | cctgattaacttttaggacaacctatgtgaacgctaatagaggaagtcgtgt       | 1450 |
|          |      | .   .     .   .   .     .   .   .   .     .   .   .        |      |
| KCNH2-NT | 1401 | cctcatcaacttccgcaccacctacgtcaatgccaacgaggaggtggtca         | 1450 |
| KCNH2-CM | 1451 | ctcatcctggcaggattgctgtgcattactttaaggggtgggtttttgatt        | 1500 |
|          |      | ..   .   .     .   .   .   .   .     .     .     .   .   . |      |
| KCNH2-NT | 1451 | gccaccccggcgcgcatcgccgtccactacttcaagggctggttcctcatc        | 1500 |
| KCNH2-CM | 1501 | gatatggctcgctgctattccttttgatttgttgattttcgggagcgggag        | 1550 |
|          |      | .     .   .   .   .   .   .   .   .     .   .   .   .      |      |
| KCNH2-NT | 1501 | gacatggtggcgcgccatccccttcgacctgctcatcttcggctctggctc        | 1550 |
| KCNH2-CM | 1551 | cgaagaattgattggcctcctcaaaaccgccagactcctcagactcgtca         | 1600 |
|          |      | .   .   .     .   .   .   .   .   .   .   .   .   .   .    |      |
| KCNH2-NT | 1551 | tgaggagctgatcgggctgctgaagactgcgcggtgctgcggtggtgctc         | 1600 |
| KCNH2-CM | 1601 | gggtcgccagaaaactcgacaggtatagcgaatatggtgccgctgtcctc         | 1650 |
|          |      | .   .   .   .   .   .   .   .   .   .   .   .   .   .      |      |
| KCNH2-NT | 1601 | gcgtggcgcggaagctggatcgctactcagagtacggcgcggccgtgctg         | 1650 |
| KCNH2-CM | 1651 | tttctcttgatgtgtacattcgccttgattgccattgggttggttggctt         | 1700 |
|          |      | .   .   .     .   .   .   .   .   .   .   .   .   .        |      |
| KCNH2-NT | 1651 | ttcttgctcatgtgcaccttgcgctcatcgcgactggctagcctgcat           | 1700 |
| KCNH2-CM | 1701 | ttggtatgctattgggaatatggaacaacccacatggatagcaggattg          | 1750 |
|          |      | .     .   .   .   .   .     .   .   .     .   .   .   .    |      |
| KCNH2-NT | 1701 | ctggtacgccatcggcaacatggagcagccacacatggactcacgcatcg         | 1750 |
| KCNH2-CM | 1751 | ggtggctccataatctcggggatcaaatcgggaagccatacaacagttct         | 1800 |
|          |      | .     .   .   .   .   .   .   .   .   .   .     .   .   .  |      |
| KCNH2-NT | 1751 | gctggctgcacaacctgggcgaccagataggcaaacctacaacagcagc          | 1800 |
| KCNH2-CM | 1801 | gggctcgggtggcccttccatcaaagataagtatgtcacgccttgtattt         | 1850 |
|          |      | .   .   .     .     .   .     .   .   .   .   .   .        |      |
| KCNH2-NT | 1801 | ggcctgggcggcccttccatcaaggacaagtatgtgacggcgtctactt          | 1850 |
| KCNH2-CM | 1851 | cactttttcttctttgacatccgtcgggtttgggaatgtgagccctaata         | 1900 |
|          |      | .   .     .   .   .   .   .   .   .   .   .   .   .        |      |
| KCNH2-NT | 1851 | cacctcagcagcctcaccagtgtgggcttcggcaacgtctctccaaca           | 1900 |
| KCNH2-CM | 1901 | caaatagcagagaaaatcttttcaatttgtgtgatgttgatcggaagttt         | 1950 |
|          |      | .   .   .     .     .   .   .   .   .   .   .   .   .      |      |
| KCNH2-NT | 1901 | ccaactcagagaagatcttctccatctgcgctcatgctcattggctccctc        | 1950 |
| KCNH2-CM | 1951 | atgtacgctagcatcttcggtaatgtcagcgctatcatacaagactcta          | 2000 |
|          |      | .     .     .   .   .   .   .     .   .   .   .            |      |
| KCNH2-NT | 1951 | atgtatgctagcatcttcggcaacgtgtcggccatcatccagcggctgta         | 2000 |
| KCNH2-CM | 2001 | tagcggtagcgttaggtatcataccctcaaatgctcagagtcagagagttca       | 2050 |
|          |      | ....   .   .   .   .   .   .   .     .   .   .   .   .     |      |
| KCNH2-NT | 2001 | ctcgggcacagcccgtaccacacacagatgctgcggtgctgggagttca          | 2050 |
| KCNH2-CM | 2051 | tcaggtttcatcaaatcctaaccctctcaggcaaggttgggaagagtat          | 2100 |
|          |      | .   .   .   .   .   .   .   .   .   .   .   .   .          |      |
| KCNH2-NT | 2051 | tccgcttccaccagatccccaatcccctgcgccagcgcctcaggaggtac         | 2100 |

|          |      |                                                       |      |
|----------|------|-------------------------------------------------------|------|
| KCNH2-CM | 2101 | ttccaacatgcttggagttatacaaatgggattgatatgaatgccgtcct    | 2150 |
|          |      | .   .   .   .   .   .   .   .   .   .   .   .   .     |      |
| KCNH2-NT | 2101 | ttccagcagcctggtcctacaccaacggcatcgacatgaacgcgggtgct    | 2150 |
| KCNH2-CM | 2151 | caaagggtttcccgaatgtctccaagccgacatctgtctccatctcaata    | 2200 |
|          |      | .   .   .   .   .   .   .   .   .   .   .   .   .   . |      |
| KCNH2-NT | 2151 | gaagggcttccctgagtgctgacaggtgacatctgctgacacctgaacc     | 2200 |
| KCNH2-CM | 2201 | ggagcctcctccaacattgtaagccatttcgggggtgccacaaaaggggtg   | 2250 |
|          |      | ....   .   .   .   .   .   .   .   .   .   .   .   .  |      |
| KCNH2-NT | 2201 | gctcactgctgcagcactgcaaacccttcgagggggccaccaagggctgc    | 2250 |
| KCNH2-CM | 2251 | ttgcgggctctcgctatgaaattcaaaacaaccatgcacccccaggcga     | 2300 |
|          |      | . . .     .   .   .   .   .   .   .   .   .   .   .   |      |
| KCNH2-NT | 2251 | cttcggggcctggccatgaagttcaagaccacacatgcaccgccagggga    | 2300 |
| KCNH2-CM | 2301 | taccctcgtccacgcggagatctcttgacagctctctacttcatctcca     | 2350 |
|          |      | .   .   .   .   .   .   .   .   .   .   .   .   .   . |      |
| KCNH2-NT | 2301 | cacactggtgcatgctggggacctgctcaccgccctgtacttcatctccc    | 2350 |
| KCNH2-CM | 2351 | gagggagattgaaattctcagaggggatgtgggtggtcgctattctcggc    | 2400 |
|          |      | .   .   .   .   .   .   .   .   .   .   .   .   .   . |      |
| KCNH2-NT | 2351 | ggggctccatcgagatcctgcggggacgctcgctcgctggccatcctgggg   | 2400 |
| KCNH2-CM | 2401 | aaaaacgacatctttggcgaaccactcaatctctacgccagaccgggaa     | 2450 |
|          |      | .   .     .   .   .   .   .   .   .   .   .   .       |      |
| KCNH2-NT | 2401 | aagaatgacatctttggggagcctctgaacctgtatgcaaggcctggcaa    | 2450 |
| KCNH2-CM | 2451 | aagcaatggcgacgtcagagctttgacatattgcgatttgcacaagatcc    | 2500 |
|          |      | ....   .   .   .   .   .   .   .   .   .   .   .   .  |      |
| KCNH2-NT | 2451 | gtcgaacggggatgtgcgggccctcacctactgtgacctacacaagatcc    | 2500 |
| KCNH2-CM | 2501 | acagagatgatctcctcgaagtcctcgatagtatccccagagtttagtgat   | 2550 |
|          |      | .. . .   .   .   .   .   .   .   .   .   .   .   .    |      |
| KCNH2-NT | 2501 | atcgggacgacctgctggaggtgctggacatgtaccctgagttctccgac    | 2550 |
| KCNH2-CM | 2551 | cacttttggagttctctcgaaatcaccttcaatctcagggacacaaacat    | 2600 |
|          |      | .   .   .   .   .   .   .   .   .   .   .   .         |      |
| KCNH2-NT | 2551 | cacttctggtccagcctggagatcaccttcaacctgagataaccaacat     | 2600 |
| KCNH2-CM | 2601 | gattcccgggagtcaggggtccaccgaactggaaggcgggtttccagac     | 2650 |
|          |      | .   .   .   .   .   .   .   .   .   .   .   .   .     |      |
| KCNH2-NT | 2601 | gatcccgggctccccggcagtagcggagtttagaggggtggcttcagtcggc  | 2650 |
| KCNH2-CM | 2651 | agaggaaaaggaaactcagttttaggaggcgcacggataaagataccgaa    | 2700 |
|          |      | .. . .   .   .   .   .   .   .   .   .   .   .   .    |      |
| KCNH2-NT | 2651 | aacgcaagcgcaagttgtccttcgcagggcgcacggacaaggacacggag    | 2700 |
| KCNH2-CM | 2701 | caaccggcgaagtcagcgtctgggcccctggcagagcaggagcaggccc     | 2750 |
|          |      | .   .   .   .   .   .   .   .   .   .   .   .   .     |      |
| KCNH2-NT | 2701 | cagccaggggaggtgtcggccttggggccggggcggggcggggcaggggcc   | 2750 |
| KCNH2-CM | 2751 | ttcctcaagagggaggccaggaggtccctggggagaaatctcccagttccg   | 2800 |
|          |      | ..... . .   .   .   .   .   .   .   .   .   .   .     |      |
| KCNH2-NT | 2751 | gagtagccggggccggccggggggggccgtggggggagagcccgtccagtg   | 2800 |

|          |      |                                                                                                                |      |
|----------|------|----------------------------------------------------------------------------------------------------------------|------|
| KCNH2-CM | 2801 | ggcctagttcaccggaatcttccgaagatgaaggacccggtaggtctagt<br> .   ..... . . ..... . .     .   .   .   .....           | 2850 |
| KCNH2-NT | 2801 | gccctccagccctgagagcagtgaggatgagggccagggccgagctcc                                                               | 2850 |
| KCNH2-CM | 2851 | tctcctttgaggctcgtcccttttagttctccacggccacctggcgaacc<br>...   ... . . . . ..... . .     .   .   .                | 2900 |
| KCNH2-NT | 2851 | agccccctccgctggtgcccttctccagccccagggcccccgagagcc                                                               | 2900 |
| KCNH2-CM | 2901 | tcccggaggggaacctctcatggaagattgtgagaaatcttctgatactt<br>. . . .     .   .  .     .   .  .     ..... . .          | 2950 |
| KCNH2-NT | 2901 | gccgggtggggagcccctgatggaggactgcgagaagagcagcgacactt                                                             | 2950 |
| KCNH2-CM | 2951 | gtaatcctctcagcggggcttttagcggagtctccaatatcttttctttt<br> .   .   .   ..... . . . ..... . .     .   .   ..... . . | 3000 |
| KCNH2-NT | 2951 | gcaacccccctgtcaggcgccttctcaggagtgtccaacattttcagcttc                                                            | 3000 |
| KCNH2-CM | 3001 | tggggcgattccagagggaggcaatatcaagaattgccaaggtgtcctgc<br>     .   ..... . . ... . . . . . . ..... . .             | 3050 |
| KCNH2-NT | 3001 | tggggggacagtcggggccgccagtaccaggagctccctcgatgccccgc                                                             | 3050 |
| KCNH2-CM | 3051 | tctacaccttctttggtgaacattcctttgagttctcccggcagacgcc<br>. . . .     ..... . .     .   .   ..... . .               | 3100 |
| KCNH2-NT | 3051 | ccccacccccagcctcctcaacatccccctctccagccccgggtcggcggc                                                            | 3100 |
| KCNH2-CM | 3101 | cgaggggagatgtcgaatctcgccctcgacgctttgcaaaggcaattgaat<br> .     .   .   ..... . .     .   .   ..... . .          | 3150 |
| KCNH2-NT | 3101 | cccggggcgacgtggagagcaggctggatgccctccagcgccagctcaac                                                             | 3150 |
| KCNH2-CM | 3151 | cgcctcgaaacaagactctccgctgacatggctaccgtgctccaactctt<br>. .     .   ... . . ..... . .     .   .   .   .   ...    | 3200 |
| KCNH2-NT | 3151 | aggctggagaccggctgagtgacagacatggccactgtcctgcagctgct                                                             | 3200 |
| KCNH2-CM | 3201 | gcaacgccaaatgaccctcgtgccccctgcttattccgccgtcacaacac<br>. . ... . .     .   .  .     .   .   ..... . .           | 3250 |
| KCNH2-NT | 3201 | acagaggcagatgacgctggtccccgccgctacagtgtgtgaccaccc                                                               | 3250 |
| KCNH2-CM | 3251 | cgggaccgggaccaaccagtaccagtccccctcctcctgtgtctccttg<br>     .   .  .     ..... . .     .   .   ..... . .         | 3300 |
| KCNH2-NT | 3251 | cggggcctggccccacttccacatccccgctggtgcccgtcagccccctc                                                             | 3300 |
| KCNH2-CM | 3301 | cctacattgacactcgatagcttgagccaagtgagtcagttcatggcctg<br>  .    ... . . ... . .     .   .   ..... . .             | 3350 |
| KCNH2-NT | 3301 | cccaccctcaccttggaactcgtttctcagggtttcccagttcatggcgtg                                                            | 3350 |
| KCNH2-CM | 3351 | cgaagaacttctcctggcgctcccgaattgcccccaagaaggacctacca<br>. .     .   .  .     ..... . .     .   .   .....         | 3400 |
| KCNH2-NT | 3351 | tgaggagctgccccggggggccccagagcttcccccaagaaggccccacac                                                            | 3400 |
| KCNH2-CM | 3401 | ggaggttgagtttgccctgggcaactcggcgctttgacaagtcaacctctc<br> ... ... ... ... ... ... ... ... ... ... ... ... ...    | 3450 |
| KCNH2-NT | 3401 | gacgcctctccctaccggggccagctggggggccctcacctcccagccccctg                                                          | 3450 |
| KCNH2-CM | 3451 | catcggcacgggagcgatccccgggtcctga                                                                                | 3480 |
| KCNH2-NT | 3451 | cacagacacggctcggacccggggcagttag                                                                                | 3480 |

|         |                                                                             |      |
|---------|-----------------------------------------------------------------------------|------|
| hERG-NT | MPVRRGHVAPQNTFLDTIIRKFEFGQSRKFIIANARVENCACAVIYCNDFGFCELCGYSRAEVM            | 60   |
| hERG-CM | MPVRRGHVAPQNTFLDTIIRKFEFGQSRKFIIANARVENCACAVIYCNDFGFCELCGYSRAEVM<br>*****   | 60   |
| hERG-NT | QRPCTCDFLHGPRTORRAAAQIAQALLGAERKVEIAFYRKDGSCFLCLVDVVPVKNEDEG                | 120  |
| hERG-CM | QRPCTCDFLHGPRTORRAAAQIAQALLGAERKVEIAFYRKDGSCFLCLVDVVPVKNEDEG<br>*****       | 120  |
| hERG-NT | AVIMFILNFVVMKDMVGS PAHDTNHRGPP TSWLAPGRAKTFRLKLPALLALTARESSV                | 180  |
| hERG-CM | AVIMFILNFVVMKDMVGS PAHDTNHRGPP TSWLAPGRAKTFRLKLPALLALTARESSV<br>*****       | 180  |
| hERG-NT | RSGGAGGAGAPGAVVVDVLT PAAPSSS LALDEVTAMD NHVAGLPAEERRALVGP GSP               | 240  |
| hERG-CM | RSGGAGGAGAPGAVVVDVLT PAAPSSS LALDEVTAMD NHVAGLPAEERRALVGP GSP<br>*****      | 240  |
| hERG-NT | PRSAPGQLPS PRAHSLNP DASGSSCSLAR TRSRESCASVRRASSADD IEAMRAGVL PPPP           | 300  |
| hERG-CM | PRSAPGQLPS PRAHSLNP DASGSSCSLAR TRSRESCASVRRASSADD IEAMRAGVL PPPP<br>*****  | 300  |
| hERG-NT | RHASTGAMHPLRSGLLNSTSDSDLVRYRTISKIPQITLNFVDLKGDPFLASPTSDREIIA                | 360  |
| hERG-CM | RHASTGAMHPLRSGLLNSTSDSDLVRYRTISKIPQITLNFVDLKGDPFLASPTSDREIIA<br>*****       | 360  |
| hERG-NT | PKIKERTHNVTEKVTQVLSL GADVLPEYK LQAPRIHRWTILHYS PFKAVD WLILLLV IY            | 420  |
| hERG-CM | PKIKERTHNVTEKVTQVLSL GADVLPEYK LQAPRIHRWTILHYS PFKAVD WLILLLV IY<br>*****   | 420  |
| hERG-NT | TAVFTPYSA AFLLKE TEEGPPATECGYACQPLAVVDLIVD IMFIVDILINFR TTYVNANE            | 480  |
| hERG-CM | TAVFTPYSA AFLLKE TEEGPPATECGYACQPLAVVDLIVD IMFIVDILINFR TTYVNANE<br>*****   | 480  |
| hERG-NT | EVVSHPGRIAVHYFKGWFLIDMVA AIPFDLLIFGSGS EELIGLLKTARLLRLVRVARKLD              | 540  |
| hERG-CM | EVVSHPGRIAVHYFKGWFLIDMVA AIPFDLLIFGSGS EELIGLLKTARLLRLVRVARKLD<br>*****     | 540  |
| hERG-NT | RYSEYGA AVLFLLMCTFALIAHWLACI WYAI GNM EQPHMDSRIGWLHNLGDQIGKPYNSS            | 600  |
| hERG-CM | RYSEYGA AVLFLLMCTFALIAHWLACI WYAI GNM EQPHMDSRIGWLHNLGDQIGKPYNSS<br>*****   | 600  |
| hERG-NT | GLGGPSIKDKYVTALYFTFSS LTVS VFGNVSPNTNSEKIF SICVMLIGSLMYASIFGNVS             | 660  |
| hERG-CM | GLGGPSIKDKYVTALYFTFSS LTVS VFGNVSPNTNSEKIF SICVMLIGSLMYASIFGNVS<br>*****    | 660  |
| hERG-NT | AIIQRLYSGTARYHTQMLRVREFIRFHQIPNPLRQRLEEFQHAWSYTNGIDMNAVLKGF                 | 720  |
| hERG-CM | AIIQRLYSGTARYHTQMLRVREFIRFHQIPNPLRQRLEEFQHAWSYTNGIDMNAVLKGF<br>*****        | 720  |
| hERG-NT | PECLQADICLHLNRSLLQHCKPFRGATKGCLRALAMKFKTTHAPPGDTLVHAGDLLTALY                | 780  |
| hERG-CM | PECLQADICLHLNRSLLQHCKPFRGATKGCLRALAMKFKTTHAPPGDTLVHAGDLLTALY<br>*****       | 780  |
| hERG-NT | FISRGSIEILRGDVVVA I L GKN DIFGEPLNLYARPGKSN GDV RALTYCDLHKIHRDDLLE          | 840  |
| hERG-CM | FISRGSIEILRGDVVVA I L GKN DIFGEPLNLYARPGKSN GDV RALTYCDLHKIHRDDLLE<br>***** | 840  |
| hERG-NT | VLDMPYEFSDHFWSSLEITFNLRD TNMIPGSPGSTELEGGFSRQRKRKLSFRRRTDKDTE               | 900  |
| hERG-CM | VLDMPYEFSDHFWSSLEITFNLRD TNMIPGSPGSTELEGGFSRQRKRKLSFRRRTDKDTE<br>*****      | 900  |
| hERG-NT | QPGEVSALGPGRAGAPSSRGRPGGPWGES PSSGSPSSPE SSEDEG PGRSSSPLRLV P FSS           | 960  |
| hERG-CM | QPGEVSALGPGRAGAPSSRGRPGGPWGES PSSGSPSSPE SSEDEG PGRSSSPLRLV P FSS<br>*****  | 960  |
| hERG-NT | PRPPGEPGGPEPLMEDCEKSSDTCNPLSGAFSGVSNIFSFWDGSRGRQYQELPRCPAPT P               | 1020 |
| hERG-CM | PRPPGEPGGPEPLMEDCEKSSDTCNPLSGAFSGVSNIFSFWDGSRGRQYQELPRCPAPT P<br>*****      | 1020 |

\*\*\*\*\*

hERG-NT SLLNIPLSSPGRRPRGDVESRLDALQRQLNRLETRLSDMATVLQLLQRQMTLVPPAYSA 1080

hERG-CM SLLNIPLSSPGRRPRGDVESRLDALQRQLNRLETRLSDMATVLQLLQRQMTLVPPAYSA 1080

\*\*\*\*\*

hERG-NT VTTPGPGPTSTSPLLPVSPLPTLTLDSLSQVSQFMACEELPPGAPQLPQEGPTRRLSLPG 1140

hERG-CM VTTPGPGPTSTSPLLPVSPLPTLTLDSLSQVSQFMACEELPPGAPQLPQEGPTRRLSLPG 1140

\*\*\*\*\*

hERG-NT QLGALTSQPLHRHGSDPGS 1159

hERG-CM QLGALTSQPLHRHGSDPGS 1159

\*\*\*\*\*



**Supplementary Figure 1: Nucleotide and protein sequence alignment of hERG-NT and hERG-CM.**

A) hERG-NT and hERG-CM nucleotide alignment demonstrating the extensive nucleotide sequence changes in hERG-CM. B) Amino acid alignment of hERG-NT and hERG-CM, demonstrating 100% protein sequence identity.

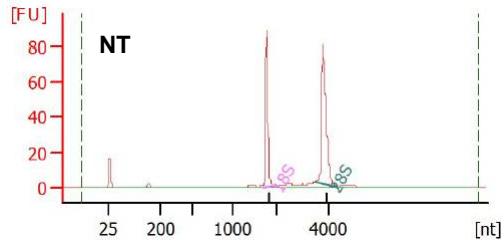

RNA Concentration: 116 ng/ $\mu$ l  
rRNA Ratio [28s / 18s]: 1.7  
RNA Integrity Number (RIN): 9.9 (B.02.08)

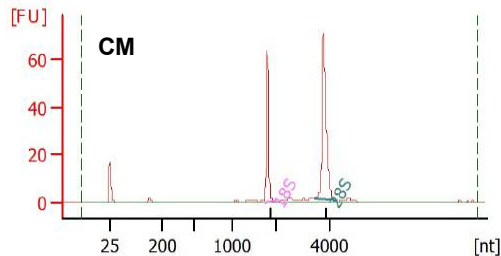

RNA Concentration: 85 ng/ $\mu$ l  
rRNA Ratio [28s / 18s]: 1.8  
RNA Integrity Number (RIN): 10 (B.02.08)

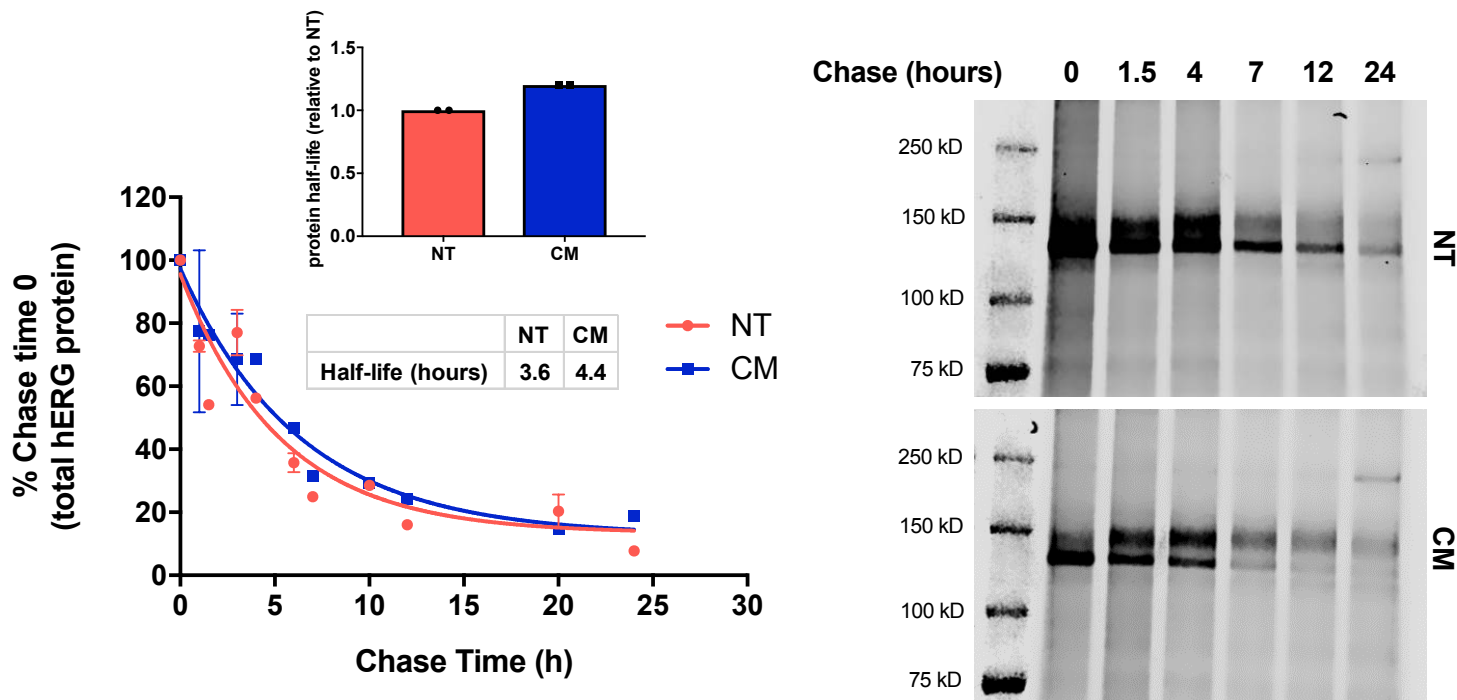

**Supplementary Figure 3: Myc-tagged hERG-CM displays a subtle increase in half-life.** Graph and representative immunoblot of AHA pulse-chase to determine amino-terminally Myc-tagged hERG-NT and hERG-CM protein half-life. Experimental procedures mentioned in the materials and methods section were followed although immunoprecipitations were performed with 500 ng of hERG C20 (Catalog # SC-15968, SantaCruz). Two independent transfections were performed (one with one replicate and the other with two replicates) (N = 2). Results of one-phase decay for the Myc-tagged hERG-NT and hERG-CM half-life determinations are shown. A bar graph representing the increases in the determined half-life of hERG-CM compared to hERG-NT protein for each independent assay (inset).

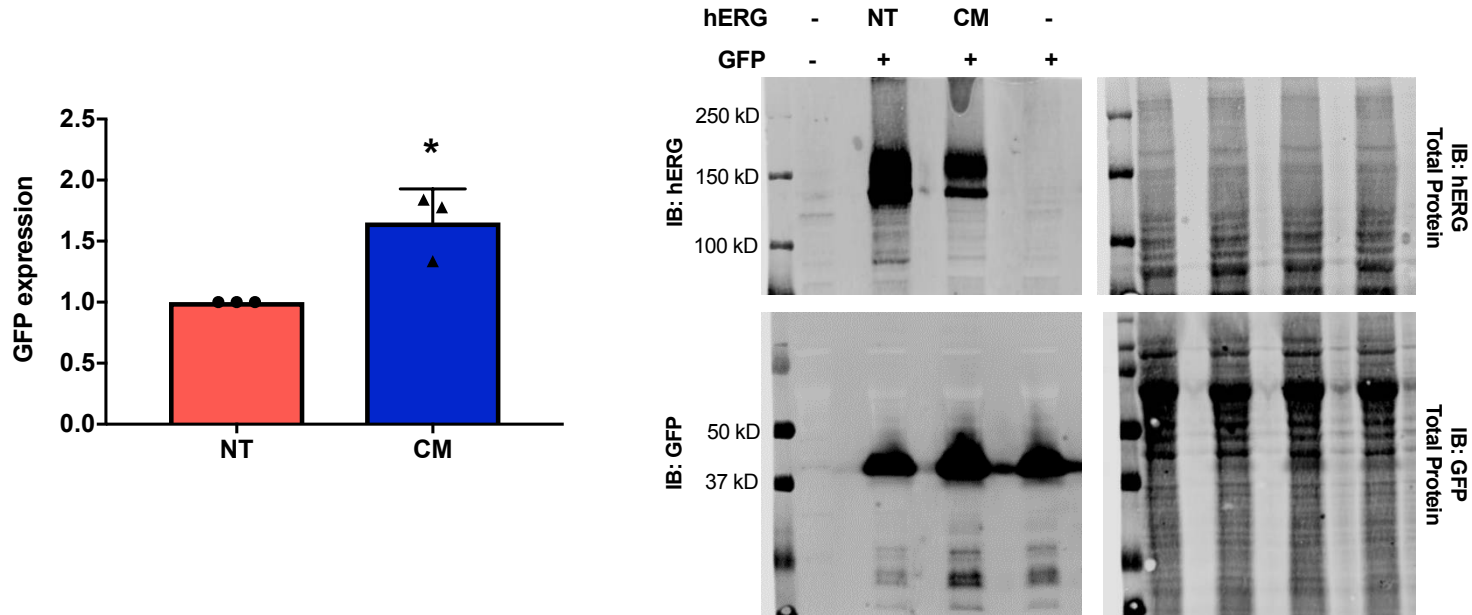

**Supplementary Figure 4: GFP expression upon co-transfection with hERG-CM is not less than when co-expressed with hERG-NT.** super folder GFP, hereafter referred to as GFP, protein expression when co-transfected with either hERG-NT or hERG-CM constructs is demonstrated by a graph of total GFP protein expression for both conditions along with a representative immunoblot from western analysis of lysate (from NDET lysis) two days post transfection. Results were obtained from three independent transfections (N= 3) in 12-well plates transfecting 250 ng hERG construct and 42 ng GFP per well. GFP was detected with GFP antibody (FL) (Catalog # SC-8334, Santa Cruz) used at 1:1000. GFP expression was significantly greater when co-expressed with hERG-CM than when co-expressed with hERG-NT as determined by t-test analysis,  $p = 0.0147$ .
