# Supplementary material
Source: PubMed Central journal article supplement (PMC6078446)
Supplement: supp_RA118.001805_135152_2_supp_153878_plbl3g.pdf [file supp_RA118.001805_135152_2_supp_153878_plbl3g.pdf]

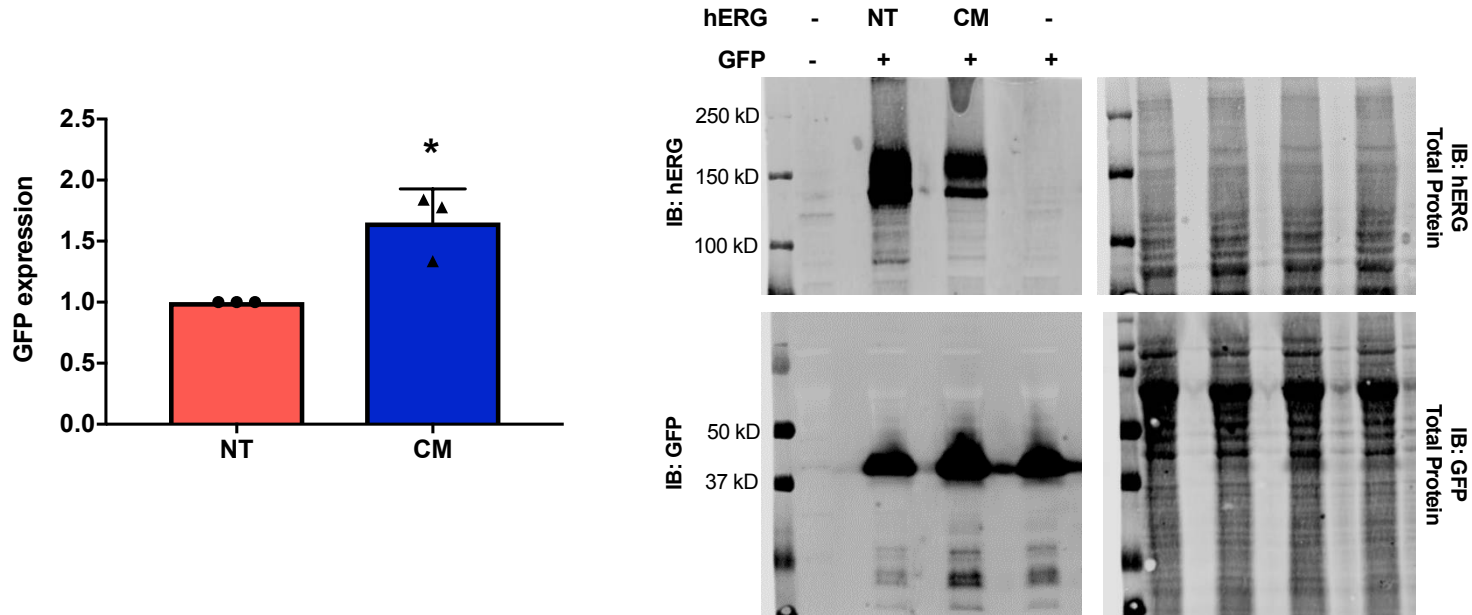

**Supplementary Figure 4: GFP expression upon co-transfection with hERG-CM is not less than when co-expressed with hERG-NT.** super folder GFP, hereafter referred to as GFP, protein expression when co-transfected with either hERG-NT or hERG-CM constructs is demonstrated by a graph of total GFP protein expression for both conditions along with a representative immunoblot from western analysis of lysate (from NDET lysis) two days post transfection. Results were obtained from three independent transfections (N= 3) in 12-well plates transfecting 250 ng hERG construct and 42 ng GFP per well. GFP was detected with GFP antibody (FL) (Catalog # SC-8334, Santa Cruz) used at 1:1000. GFP expression was significantly greater when co-expressed with hERG-CM than when co-expressed with hERG-NT as determined by t-test analysis,  $p = 0.0147$ .
